1  
2  
3  
4  
5  
6  
7  
8  
9  
10  
11  
12  
13  
14  
15  
16  
17  
18  
19  
20  
21  
22  
23  
24  
25  
26  
27  
28  
29  
30  
31  
32

**IPSE, a parasite-derived host immunomodulatory protein, is a promising therapeutic for hemorrhagic cystitis**

**Running head: IPSE as potential hemorrhagic cystitis therapy**

Rebecca S. Zee \*, †, Evaristus C. Mbanefo\*, †, Loc H. Le†, Luke F. Pennington‡, Justin Odegaard§, Theodore S. Jardetzky‡, Abdulaziz Alouffi¶, Jude Akinwale□, Franco H. Falcone□, Michael H. Hsieh\*, †, #

\* Division of Urology, Children’s National Medical Center, Washington DC, USA

† Bladder Immunology Group, Biomedical Research Institute, Rockville, MD, USA

‡ Department of Structural Biology, Stanford University School of Medicine, Stanford, CA, USA

§ Guardant Health, Redwood City, CA, USA

¶ Life science and Environment Sector, King Abdulaziz City for Science and Technology (KACST), Riyadh, Saudi Arabia

□ Division of Molecular Therapeutics and Formulation, School of Pharmacy, University of Nottingham, Nottingham, United Kingdom

# The George Washington University, Washington, DC, USA

Correspondence:

Michael H. Hsieh  
Children’s National Medical Center  
111 Michigan Ave NW  
Washington, D.C. 20010  
Telephone: 202-476-1293  
Fax: 202-476-4739  
Email: mhsieh@childrensnational.org

Figure count: 6

## 1 **Abbreviations**

- |   |       |                                                                       |
|---|-------|-----------------------------------------------------------------------|
| 2 | CFSE  | 5-(and 6)-Carboxyfluorescein diacetate succinimidyl ester             |
| 3 | IPSE  | Interleukin-4 inducing principle from <i>Schistosoma mansoni</i> eggs |
| 4 | MESNA | 2-mercaptoethanesulfonic acid                                         |
| 5 | NLS   | Nuclear localization sequence                                         |

1 **Abstract**

2 Chemotherapy-induced hemorrhagic cystitis is characterized by bladder pain and  
3 voiding dysfunction caused by hemorrhage and inflammation. Of currently available  
4 therapies, prophylactic 2-mercaptoethanesulfonic acid (MESNA) has limited efficacy  
5 and cannot treat pre-existing lesions. Therefore, novel therapeutic options to treat  
6 hemorrhagic cystitis are needed. We previously reported that systemic administration of  
7 the *Schistosomiasis haematobium*-derived protein H-IPSE<sup>H06</sup> (IL-4-inducing principle  
8 from *Schistosoma mansoni* eggs), is superior to 3 doses of MESNA in alleviating  
9 hemorrhagic cystitis. Based on prior reports by others on *S. mansoni* IPSE and  
10 additional work by our group, we reasoned that H-IPSE<sup>H06</sup> mediates its effects on  
11 hemorrhagic cystitis by binding IgE on basophils and inducing IL-4 expression,  
12 promoting urothelial proliferation, and translocating to the nucleus to modulate  
13 expression of genes implicated in relieving bladder dysfunction. We speculated that  
14 local bladder injection of the *S. haematobium* IPSE ortholog IPSE<sup>H03</sup>, hereafter called H-  
15 IPSE<sup>H03</sup>, might be more efficacious in preventing hemorrhagic cystitis compared to  
16 systemic administration of IPSE<sup>H06</sup>. We demonstrate herein that H-IPSE<sup>H03</sup> is a  
17 promising therapeutic for the treatment of voiding dysfunction and bladder pain in  
18 hemorrhagic cystitis. Namely, it attenuates ifosfamide-induced increases in bladder wet  
19 weight in an IL-4-dependent fashion. H-IPSE<sup>H03</sup> relieves hemorrhagic cystitis-associated  
20 allodynia. Finally, H-IPSE<sup>H03</sup> drives increased urothelial cell proliferation. This indicates  
21 that IPSE induces bladder healing mechanisms, which suggests that it may be a novel  
22 non-opioid analgesic to treat bladder pain syndromes.

23 **Key words:** IL-4, IPSE, hemorrhagic cystitis, schistosomiasis

## 1 Introduction

2 Ifosfamide and other alkylating chemotherapy agents are used in a wide variety  
3 of malignancies including leukemias, soft tissue sarcomas, and testis cancer. The liver  
4 metabolizes ifosfamide into acrolein, which is excreted in the urine and has a  
5 deleterious effect on the urothelium. Hemorrhagic cystitis is characterized by bladder  
6 edema, hemorrhage, urothelial denudation, and infiltration of inflammatory cells. This  
7 condition affects up to 40% of ifosfamide-exposed patients, resulting in hematuria,  
8 dysuria, bladder spasms, and urinary frequency (9). Hemorrhagic cystitis is a  
9 challenging condition to manage, and often requires hospitalization and invasive  
10 treatments (16).

11 Accordingly, strategies to attenuate ifosfamide-induced hemorrhagic cystitis,  
12 such as administration of 2-mercaptoethanesulfonic acid (MESNA), bladder irrigation, or  
13 hyperhydration often achieve suboptimal protection for patients (16). Despite use of  
14 existing therapies, a majority of patients have symptomatic and/or histologic evidence of  
15 hemorrhagic cystitis (14). As an alternative to current management approaches,  
16 Macedo *et al.* reported that administration of recombinant interleukin-4 (IL-4) attenuated  
17 the effects of ifosfamide in a mouse model of hemorrhagic cystitis (15). The importance  
18 of IL-4 in this model was demonstrated by administration of anti-IL4 antibody to  
19 ifosfamide-exposed, wild type mice and administration of ifosfamide to IL-4-deficient  
20 mice, both of which resulted in worsened hemorrhagic cystitis (20). Interestingly,  
21 ifosfamide administration increased endogenous production of IL-4, suggesting the  
22 existence of intrinsic regulatory mechanisms to control inflammation in response to  
23 ifosfamide (15). However, systemic administration of IL-4 to treat hemorrhagic cystitis

24 may not be a realistic option due to pleiotropic effects and a short *in vivo* half-life of this  
25 cytokine (18). Therefore, alternative strategies to increase expression of IL-4 would be  
26 needed in order to leverage this cytokine for therapeutic treatment of hemorrhagic  
27 cystitis.

28 One alternative may be the interleukin-4 inducing principle from *Schistosoma*  
29 *mansoni* eggs (IPSE), the most abundant protein secreted by *S. mansoni* eggs. IPSE  
30 attenuates inflammation via multiple mechanisms, including binding immunoglobulins to  
31 stimulate IL-4 release, sequestering chemokines, and translocating to the nucleus to  
32 modulate transcription (17, 19). We have previously reported that similar to the *S.*  
33 *mansoni* ortholog of IPSE, M-IPSE, several *S. haematobium* orthologs, referred  
34 hereafter as H-IPSE, bind to IgE on mast cells and basophils and upregulate the  
35 expression of IL-4 (19). We identified two main clades of H-IPSE exemplified by the  
36 orthologs IPSE<sup>H03</sup> and IPSE<sup>H06</sup>. Importantly, both IPSE<sup>H03</sup> and IPSE<sup>H06</sup> translocate into  
37 urothelial cell nuclei (19).

38 Initial animal experiments with H-IPSE focused on the effect of systemic  
39 administration of H-IPSE<sup>H06</sup> by tail vein injection (17). Tail vein injection of H-IPSE<sup>H06</sup>  
40 attenuates ifosfamide-induced bladder hemorrhage in an IL-4 and NLS-dependent  
41 manner. Furthermore, mice treated with H-IPSE<sup>H06</sup> prior to ifosfamide exposure  
42 demonstrated fewer spontaneous pain behaviors and had a higher threshold for evoked  
43 pain responses. We speculated that direct injection of IPSE into the bladder wall would  
44 have multiple advantages over intravenous injection, including avoidance of side effects  
45 caused by systemic administration (although none have been identified to date), and  
46 potentially decreased dosage to achieve a therapeutic effect. The aim of this work was

47 to determine whether direct bladder wall injection of H-IPSE<sup>H03</sup> attenuates bladder  
48 inflammation, voiding dysfunction and pain in a mouse model of hemorrhagic cystitis.

49

## 1 **Materials and Methods**

### 2 Mice

3 Six to 8-week-old female C57BL/6 mice (Charles River Laboratories, Wilmington,  
4 MA) were housed in cages with free access to water and standard chow and 12 hour  
5 light-dark cycles. Mice were acclimated for at least 7 days prior to experimentation. The  
6 animal protocol was approved by the Institutional Animal Care and Use Committee at  
7 the Biomedical Research Institute (Rockville, MD). Our institutional animal care and use  
8 committee guidelines follow the U.S. Public Health Service Policy on Human Care and  
9 Use of Laboratory Animals.

10

### 11 Bladder wall injections

12 Mice were anesthetized with 2% continuous isoflurane on a heating pad.  
13 Procedures were performed using sterile technique. For pain control, 0.1 mg/kg  
14 buprenorphine and 0.1 mg/kg bupivacaine were injected subcutaneously. A midline  
15 laparotomy was performed sharply and the bladder delivered through the incision. Mice  
16 were divided into 3 groups receiving sham, control or IPSE. A 30-gauge needle was  
17 used to inject a 1:1 v/v mixture of Low Growth Factor Matrigel (Corning, Corning, New  
18 York) and PBS containing 25 µg mouse albumin (control) or 25 µg H-IPSE (IPSE)  
19 (Figure 1). Sham mice received a midline laparotomy only. Incisions were closed in 2  
20 layers using 5-0 Vicryl on the abdominal wall and 5-0 silk to close skin. Bacitracin was  
21 applied to the incision. The mice were recovered on a heating pad. Twenty-four hours  
22 later mice were injected with 400 mg/kg ifosfamide (Sigma-aldrich, St. Louis, MO). Mice  
23 who received anti-IL4 antibody (inVivoMab 11B11, BioXcell, West Lebanon, NH)

24 received 10 ng by intraperitoneal (IP) injection 30 minutes before ifosfamide. Control  
25 mice received IP injections of phosphate-buffered saline (PBS). At 12 hours, mice were  
26 euthanized, bladders were removed and weighed. Bladders were then subjected to  
27 additional analysis detailed below.

#### 28 Tail vein injections

29 Mice were anesthetized with 2% continuous isoflurane on a heating pad. A 30-  
30 gauge needle was used to inject PBS containing 25 µg mouse albumin or 25 µg H-  
31 IPSE<sup>H03</sup> (IPSE) in PBS. The mice were recovered on a heating pad. Twenty-four hours  
32 later mice were injected with 400 mg/kg ifosfamide (Sigma-aldrich, St. Louis, MO). Mice  
33 who received anti-IL4 antibody (inVivoMab 11B11, BioXcell, West Lebanon, NH)  
34 received 10 ng by intraperitoneal (IP) injection 30 minutes before ifosfamide. Control  
35 mice received IP injections of phosphate-buffered saline (PBS). At 12 hours, mice were  
36 euthanized, bladders were removed and weighed. Bladders were then subjected to  
37 additional analysis detailed below.

#### 38 Recombinant IPSE protein

39 Recombinant IPSE protein was generated as previously described (1,2). One  
40 milligram of plasmid DNA was purified using a GeneElute HP endotoxin-free plasmid  
41 Maxiprep kit (Sigma-Aldrich), and incubated with 3 mg linear 25 kDa polyethylenimine  
42 (PolySciences, Warrington, PA) at 1 mg/mL. Finally, the plasmid was diluted in 10 mL  
43 sterile PBS for each transfection in 1L. Human embryonic kidney 293-6E cells (7)  
44 expressed secreted recombinant protein for 5 days in suspension culture using  
45 FreeStyle 293 Medium (Thermo Fisher Scientific, Waltham, MA, USA) (Figure 2A).



46 Protein was purified over 10 mL Ni-NTA resin (Qiagen, Germantown, MD, USA),  
47 washed with 25 mM imidazole PBS, pH 7.4, and eluted with 300 mM imidazole PBS, pH  
48 7.4 containing 50 mM arginine. Eluted protein was concentrated with an Amicon Ultra  
49 Centrifugal Filter Unit (EMD Millipore, Billerica, MA, USA) followed by purification with a  
50 Hiload 16/600 Superdex 200 Column (GE Healthcare, Waukesha, WI, USA). Nuclear  
51 localization mutants were generated using site-directed mutagenesis. These mutants  
52 (124-PKRRRTY-130 to 124-PKAAATY) disrupted the C-terminal NLS (NLS; H-  
53 IPSE<sup>H03NLS</sup>) (2). To decrease the risk of pyrogen contamination, FPLC machines and  
54 Hiload columns were cleaned with 0.5 M NaOH for greater than 2 hours of continuous  
55 flow and then washed with PBS, pH 7.4.

#### 56 SDS-PAGE and Western blotting

57 Purified protein was separated on 4-20% gradient gels by SDS-PAGE in 15  $\mu$ L  
58 aliquots (Mini-Protean TGX Precast Gels, Biorad). Separated proteins were then  
59 transferred to a 0.2  $\mu$ M nitrocellulose membranes. Membranes were incubated in  
60 blocking buffer for 1 hour (5% [wt/vol] dried skim milk, 0.01% [vol/vol] Tween 20, and  
61 Tris-buffered saline [TBS]) on a shaker at room temp. Primary antibody was mouse anti-  
62 His (GE-Healthcare) diluted at 1:500 and incubated overnight at 4°C followed by  
63 washing in TBS containing 1% Tween 20 for 5 min x 3. Membranes were then  
64 incubated with secondary antibody--HRP-conjugated anti-mouse IgG (Sigma-Aldrich) --  
65 for 1 hour at room temperature followed by 3 additional washes. Imaging was performed  
66 with chemiluminescence-luminol reagent (3  $\mu$ L of 30% H<sub>2</sub>O<sub>2</sub>, 0.1 Tris-HCl [pH 8.0], 2.5  
67 mM luminol, and 400  $\mu$ M coumaric acid) on a Fuji LAS4000 imager.

68 Basophil activation with recombinant M-IPSE, H-IPSE<sup>H03</sup> and H-IPSE<sup>H06</sup>

69

70 Basophil activation was quantified as previously described (23). RS-ATL8 cells were  
71 cultured in 10 mL MEM (GIBCO, USA), supplemented with 5% v/v heat-inactivated  
72 FCS (GIBCO, USA), 100 U/mL penicillin, and 100 µg/mL streptomycin (Sigma, UK) and  
73 2 mM L-glutamine (Sigma, UK). Medium was changed every 2-3 days. Cells were  
74 grown in 75 cm<sup>2</sup> flasks at 37°C in a humidified atmosphere with 5% carbon dioxide. 1  
75 mg/mL G418 (Fisher ThermoScientific, UK) and 600 µg/mL hygromycin B (Invitrogen,  
76 Paisley, UK) were used to maintain expression of human FcεRI genes and NFAT-  
77 luciferase, respectively. Prior to testing, cells were incubated overnight with M-IPSE, H-  
78 IPSE<sup>H03</sup> or H-IPSE<sup>H06</sup> at concentrations ranging from 5 to 5000 ng/mL. Luciferase  
79 assays were performed with ONE-Glo Luciferase Assay System (Promega, UK),  
80 following the manufacturer's instructions. The luciferase substrate was added and  
81 chemiluminescence was measured using an Infinite M200 microplate reader (Tecan,  
82 Männedorf, Switzerland) within 30 minutes.

### 83 Pain assessment

84 Visceral pain scores were assigned as previously described (10). The observer  
85 was blinded to mouse treatment assignments prior to assessments. Mice were placed in  
86 clean cages and acclimated for 30 min. For spontaneous pain scoring, mice were  
87 observed for 60 seconds and given a cumulative spontaneous pain score based on the  
88 following: (0) – normal; (1) – piloerection; (2) – labored breathing; (3) – ptosis; (4) –  
89 licking of abdomen (not grooming); (5) – rounded back. The maximum possible visceral  
90 pain score is 15. Pain scores were collected at baseline (prior to bladder wall injection),  
91 and 10 hours after ifosfamide was administered.

## 92 Von Frey filament testing

93 Evoked pain scores were collected in a blinded fashion to assess for referred  
94 hyperalgesia. We adopted the up-down approach as previously described (6, 13). An  
95 electronic Von Frey filament (BioSeb, Pinellas Park, Florida) was applied to the right  
96 hind footpad of the mouse for 5 seconds until the mouse displayed rapid withdrawal of  
97 the paw, jumping, or licking of the paw. The 50% withdrawal threshold was then  
98 calculated from an average of 3 measurements. Results are tabulated as the difference  
99 between baseline and post-ifosfamide values.

## 100 Voided Spot on Paper Assay

101 Voided spot on paper assays were performed as previously described (1, 8, 11,  
102 25). Mice were placed in individual cages 2 hours after ifosfamide or PBS  
103 administration. Whatman paper was cut to the dimensions of the cage floor. The paper  
104 was covered with wire mesh to prevent mice from tearing or ripping the paper. Food  
105 was provided *ad libitum* in the form of regular chow. Water was not provided to prevent  
106 fluid dripping onto the paper and causing data loss or artifact. Mice were placed under  
107 quiet conditions for 4 hours. They were then returned to normal housing conditions after  
108 completion of the experiment. The pieces of Whatman paper were converted to .tiff  
109 images using UV transillumination (Bio-Rad, Hercules, CA). Image analysis was  
110 performed with ImageJ Fiji (<https://fiji.sc/>). Corner voiding was assessed by assigning  
111 5% of the total paper area to each corner. Central voiding was assessed by assigning  
112 40% of the total area to the center of the filter paper.

## 113 *In vitro* proliferation assays

114 MB49 cells were counted and plated with equal numbers of cells in each well. H-  
115 IPSE<sup>H03</sup> or H-IPSE<sup>H03NLS</sup> were added to the cell media at the following concentrations:  
116 0.0655 pmol (1 ng/ml), 0.655 pmol (10 ng/ml), 6.55 pmol (100 ng/ml), 65.5 pmol (1000  
117 ng/ml), or PBS for control. 5-(and 6)-Carboxyfluorescein diacetate succinimidyl ester  
118 (CFSE) assays were then performed according to manufacturer's instructions  
119 (Thermofisher Scientific, Waltham, MA). One mL of a single cell suspension for each  
120 experimental condition was then acquired on a BD FACSCanto II machine (BD  
121 Biosciences, San Jose, CA). Flow cytometric analysis was performed using FlowJo  
122 software (Ashland, OR).

### 123 Statistical analysis

124

125 One-way ANOVA or Student's t-test were utilized as appropriate. *Post hoc* testing was  
126 performed with Bonferroni test. A p-value of less than 0.05 was considered statistically  
127 significant.

## 1 **Results**

### 2 **Recombinant H-IPSE<sup>H03</sup> and H-IPSE<sup>H06</sup> proteins activate IgE-bearing basophils *in*** 3 ***vitro***

4 We previously demonstrated that M-IPSE activates basophils *in vitro* through NF-  
5 AT (23). This pathway is implicated in basophil and mast cell expression of IL-4, which  
6 we have observed *in vivo* in mice administered H-IPSE<sup>H06</sup> (17). Moreover, we have also  
7 noted that ifosfamide-challenged mice given H-IPSE<sup>H06</sup> are protected from several  
8 pathogenic aspects of hemorrhagic cystitis in an IL-4-dependent fashion (17). Thus, we  
9 sought to demonstrate that H-IPSE<sup>H03</sup> and H-IPSE<sup>H06</sup>, which are both *S. haematobium*  
10 orthologs of M-IPSE, also stimulate IL-4-associated reporter gene expression *in vitro*.  
11 We first purified recombinant H-IPSE<sup>H03</sup> and H-IPSE<sup>H06</sup> from transfected HEK293-6A  
12 cells. Western blots identified a band with a molecular weight of 38-40 kDa which  
13 corresponds to the homodimeric H-IPSE structure (Figure 2A). Recombinant H-IPSE<sup>H03</sup>  
14 and H-IPSE<sup>H06</sup> protein was then incubated with IgE-loaded basophils. This resulted in  
15 NF-AT activation, which is associated with IL-4 secretion in basophils (Figure 2B).  
16 Having confirmed that H-IPSE<sup>H03</sup> triggers IL-4-associated pathways in cultured  
17 basophils, we next sought to determine the therapeutic efficacy of H-IPSE<sup>H03</sup> in the  
18 mouse model of ifosfamide-induced hemorrhagic cystitis.

### 19 **H-IPSE<sup>H03</sup> dampens chemotherapy-induced increases in bladder wet weight**

20 We assessed for an increase in bladder wet weight caused by hemorrhage,  
21 edema and cellular infiltration following ifosfamide injection. Ifosfamide administration  
22 caused a statistically significant increase in bladder wet weight compared to controls  
23 (Figure 2A, 2B; n=8, p<0.001) H-IPSE<sup>H03</sup> bladder wall injection significantly reversed the

24 increase in bladder wet weight caused by ifosfamide in bladder wall injected mice but  
25 not mice that received tail vein injection ( $p=0.02$  and N.S., respectively). The beneficial  
26 effect of IPSE on bladder wet weight was reversed by anti-IL4 antibody ( $p<0.001$ ).  
27 However, IPSE<sup>H03NLS</sup> also ameliorated ifosfamide-induced increases in bladder wet  
28 weight, regardless of mode of administration, suggesting that the therapeutic effect of  
29 IPSE on bladder wet weight is mediated by IL-4, but not dependent on IPSE  
30 translocation into the nucleus.

31 Tail vein injection results were distinct from bladder wall injection in two ways.  
32 After tail vein H-IPSE<sup>H03</sup> injection bladder wet weights decreased but remained  
33 significantly higher than non-ifosfamide-exposed controls (Figure 2B;  $p=0.03$ ).  
34 Furthermore, administration of H-IPSE<sup>NLS</sup> to ifosfamide-treated mice demonstrated a  
35 downward trend in bladder wet weight that was not significant compared to mice given  
36 only ifosfamide.

### 37 **H-IPSE<sup>H03</sup> abrogates evoked pain responses in chemotherapy-treated mice**

38 We next sought to determine whether H-IPSE<sup>H03</sup> administration had an effect on  
39 ifosfamide-induced bladder pain. We first measured referred hyperalgesia using von  
40 Frey filament testing. Mice injected with ifosfamide had greater evoked pain responses  
41 than those of control mice (Figure 3). H-IPSE<sup>H03</sup> bladder wall injection increased the  
42 withdrawal threshold, i.e., reversed allodynia caused by ifosfamide injection ( $p<0.05$ ).  
43 When neutralizing anti-IL-4 antibody was co-administered with H-IPSE<sup>H03</sup>, the protective  
44 effect of H-IPSE<sup>H03</sup> was attenuated ( $p<0.05$ ). Likewise, injection of H-IPSE<sup>H03NLS</sup>, which  
45 cannot translocate to the nucleus, also featured a decreased analgesic effect compared

46 to IPSE<sup>H03</sup> (p<0.05). H-IPSE<sup>H03</sup> had no effect on referred hyperalgesia when  
47 administered via tail vein injection (data not shown)

48 **H-IPSE<sup>H03</sup> does not significantly affect abnormal ifosfamide-induced voiding**  
49 **patterns in mice**

50 Mice are prey animals and preferentially void in the corner of their enclosures as  
51 a predator avoidance strategy. We assessed for voiding dysfunction caused by  
52 ifosfamide based on the percentage of overall voids in the corners of cages. When mice  
53 received ifosfamide, the percentage of corner voids was significantly decreased (Figure  
54 4A). H-IPSE<sup>H03</sup> increased the frequency of corner voiding in the presence of ifosfamide,  
55 but this was not a statistically significant finding. Administration of  $\alpha$ -IL4 antibody  
56 reversed the effect of H-IPSE<sup>H03</sup> on corner voiding and was not significantly different  
57 from ifosfamide treatment (p=0.07 vs. control).

58 Ifosfamide administration non-significantly increased the percentage of voids in  
59 the central area of cages (Figure 4B). H-IPSE<sup>H03</sup>,  $\alpha$ -IL4 antibody or H-IPSE<sup>H03NLS</sup> did not  
60 have a significant effect on central voiding. H-IPSE<sup>H03NLS</sup>-treated mice were not  
61 significantly different from ifosfamide-treated or control mice. Tail vein injection of H-  
62 IPSE<sup>H03</sup> did not significantly improve or alter voiding patterns in ifosfamide-treated mice  
63 (Data not shown).

64 **H-IPSE<sup>H03</sup> promotes proliferation of urothelial cells *in vitro***

65 Given the beneficial effects of H-IPSE<sup>H03</sup> on ifosfamide-induced bladder wet  
66 weight increases and pain, as well as prior data indicating a direct effect of H-IPSE<sup>H03</sup>  
67 on urothelial cells (17), we assessed the effect of H-IPSE<sup>H03</sup> on urothelial cell

68 proliferation by co-incubating H-IPSE<sup>H03</sup> with the MB49 (mouse urothelial) cell line. H-  
69 IPSE<sup>H03</sup> significantly increased cell proliferation over two successive daughter cell  
70 generations compared to controls (Figure 5A; \*p<0.05, \*\*p<0.01, \*\*\*p<0.0001; n=8).  
71 This held true across a range of H-IPSE<sup>H03</sup> concentrations. In contrast, co-incubation of  
72 cells with H-IPSE<sup>H03NLS</sup> did not cause increased proliferation over that of controls (Figure  
73 5B).



## 1 Discussion

2 Hemorrhagic cystitis is a common sequela of alkylating chemotherapy, affecting  
3 up to 40% of patients who receive ifosfamide or cyclophosphamide (14). Once  
4 established, hemorrhagic cystitis is a challenging-to-manage entity characterized by  
5 widespread bladder inflammation and leading to hematuria, dysuria, small volume  
6 voids, urinary frequency, and bladder spasms. Currently available medical therapy,  
7 MESNA, has a narrow therapeutic window as it can only be administered immediately  
8 before and during chemotherapy. MESNA can cause hypersensitivity reactions and is  
9 ineffective in treating hemorrhagic cystitis once it has been established (2, 21, 22).  
10 Therefore, novel therapies need to be developed to fulfill this unmet need.

11 One source of new drugs for hemorrhagic cystitis may be derived from  
12 *Schistosoma haematobium*. Urogenital schistosomiasis is a parasitic disease in which  
13 *Schistosoma haematobium* worms lay eggs in the bladder and other pelvic organs.  
14 Deposited eggs must traverse the host bladder wall in order to be released in the urine.  
15 Although urogenital schistosomiasis itself causes a form of hemorrhagic cystitis,  
16 hematuria can be variable or even absent (24). We reasoned that host  
17 immunomodulation by *S. haematobium* egg products allow the parasite to complete its  
18 life cycle without causing severe morbidity to its host, including hemorrhagic cystitis  
19 (10). Specifically, we postulated that *S. haematobium* eggs can accomplish this by  
20 secreting H-IPSE orthologs in order to modulate the host immune response.

21 In a prior study we demonstrated the clinical potential of exploiting the anti-  
22 inflammatory and analgesic properties of H-IPSE<sup>H06</sup> (17). A single intravenous dose of

23 H-IPSE<sup>H06</sup> was superior to MESNA in alleviating bladder hemorrhage in ifosfamide-  
24 treated mice (17).

25 Clinical translation of H-IPSE<sup>H06</sup>, H-IPSE<sup>H03</sup>, and other IPSE orthologs will require  
26 large-scale recombinant protein production. Herein we show that H-IPSE<sup>H03</sup> and H-  
27 IPSE<sup>H06</sup> can be purified from mammalian HEK293T-6A cells. Furthermore, we  
28 demonstrate that, like M-IPSE, H-IPSE<sup>H03</sup> and H-IPSE<sup>H06</sup> trigger IgE-bearing basophil  
29 NF-AT activation *in vitro*, which in turn is linked to IL-4 secretion. H-IPSE<sup>H03</sup> injected into  
30 the mouse bladder wall attenuates ifosfamide-induced increases in bladder wet weight  
31 in an IL-4 and NLS-dependent fashion. This suggests that H-IPSE<sup>H03</sup> reduces  
32 ifosfamide-induced edema, cellular infiltration, and/or hemorrhage (pathologic  
33 processes which can increase bladder wet weight). When H-IPSE<sup>H03</sup> was administered  
34 via tail vein, ifosfamide-induced increases in bladder wet weight were unaffected.  
35 Unsurprisingly, there was neither an IL-4-dependent nor nuclear translocation-  
36 dependent effect compared to controls. This is consistent with our prior report that  
37 intravenous administration of H-IPSE<sup>H06</sup> did not affect ifosfamide-mediated increases in  
38 bladder wet weight (17). There are several possible explanations for these differences  
39 in effects of bladder wall versus intravenous injections. For instance, bladder wall  
40 injections themselves may cause an increase in hemorrhage, and bladder mass due to  
41 the added weight of the matrigel. This may make it more difficult to discern weight  
42 differences between groups when compared to tail vein injection. Furthermore, bladder  
43 wall injection of H-IPSE<sup>H03</sup> may result in high local concentrations but low systemic  
44 levels. We have previously reported that peripheral basophils may play a role in IPSE's  
45 therapeutic effects in hemorrhagic cystitis (17). Recruitment of circulating basophils to

46 the site of inflammation and subsequent IL-4 release may be dependent on the action of  
47 H-IPSE outside of the bladder. Conversely, it is possible that the higher local H-IPSE<sup>H03</sup>  
48 concentrations achieved by bladder wall injection may more effectively activate bladder  
49 mast cells, basophils, and other cell types critical for therapeutic effects.

50 Another explanation for the different phenotypes observed between H-IPSE<sup>H03</sup>  
51 and H-IPSE<sup>H06</sup> is that variations in the sequence, and therefore, function of IPSE  
52 proteins have evolved such that different orthologs of H-IPSE are secreted to perform  
53 different host-modulatory functions. Both orthologs of H-IPSE are homologous to M-  
54 IPSE in that they both conserve the C-terminal nuclear localization sequence as well as  
55 7 cysteines which are responsible for forming disulfide bonds to create a homodimeric  
56 structure (19). Characterization of sequence/structure-function relationships of individual  
57 orthologs of H-IPSE is the subject of continued investigation.

58 Referred hyperalgesia is a unique feature of visceral pain which causes normally  
59 non-painful stimuli to feel painful, even in anatomically distant locations.  
60 Cyclophosphamide/ifosfamide administration in rodents is a well-established model of  
61 referred hyperalgesia (3–5). We have previously reported that intravenous delivery of  
62 H-IPSE<sup>H06</sup> alleviates visceral and referred pain in ifosfamide-treated mice (17). In a  
63 similar fashion, bladder wall-injected H-IPSE<sup>H03</sup> alleviated referred hyperalgesia in an  
64 IL-4 and NLS-dependent fashion. Post-operative pain did not affect the differences  
65 observed with H-IPSE<sup>H03</sup> administered via bladder wall injection, as we were able to  
66 demonstrate a statistically significant increase in pain threshold (i.e., decreased referred  
67 hyperalgesia) in ifosfamide-treated mice who received H-IPSE<sup>H03</sup>. This suggests that  
68 bladder wall-injected H-IPSE<sup>H03</sup> may have alleviated ifosfamide- and/or surgery-induced

69 pain. Tail vein injection of H-IPSE<sup>H03</sup> did not result in a significant difference between  
70 treatment groups (data not shown).

71 The voided spot on paper assay is a well-established, reliable model to assess  
72 lower urinary tract function in mice (1, 8, 11, 25). The characteristic voiding patterns of  
73 C57BL/6 mice consist of large volume voids in the corners of cages, whereas bladder  
74 injury causes mice to void at non-corner edges or the center of cages (25). We  
75 demonstrated that ifosfamide exposure alters voiding behavior by significantly  
76 decreasing corner voiding. This was non-significantly reversed by H-IPSE<sup>H03</sup> bladder  
77 wall injection. Ifosfamide-treated mice tended to void in the central part of the cage,  
78 although this was not significant. The voided spot on paper assay results may have  
79 been influenced by surgical intervention and accompanying post-operative pain. Tail  
80 vein injection of H-IPSE<sup>H03</sup> did not affect voiding patterns in ifosfamide-treated mice at  
81 all (data not shown). We did not allow mice to drink water during the 4 hour duration of  
82 assay to avoid possible interference of dripping water with collection of urine on filter  
83 paper. Post-operative pain in bladder wall-injected mice, as well as the lack of water  
84 access, may have influenced voiding behavior independent of the effects of IPSE.

85 We previously demonstrated that H-IPSE<sup>H06</sup> induces transcription of uroplakins in  
86 the ifosfamide-injured bladder to a degree similar to or greater than MESNA (17).  
87 Uroplakins are transmembrane proteins implicated in barrier functions, urothelial  
88 proliferation and bladder regeneration (12). Co-incubation of a variety of urothelial cell  
89 lines with H-IPSE<sup>H06</sup> significantly increases cell proliferation (data not shown).  
90 Moreover, co-incubation of the urothelial cell line MB49 with H-IPSE<sup>H03</sup> induced a much  
91 stronger proliferative response than H-IPSE<sup>H06</sup>. The pro-proliferative effect of H-IPSE<sup>H03</sup>

92 was nuclear localization sequence-dependent. This supports the notion that H-IPSE<sup>H03</sup>  
93 may upregulate urothelial repair mechanisms through translocation to the nucleus and  
94 modulation of gene expression. Future work will be directed towards further quantifying  
95 changes in uroplakin and related gene expression induced by H-IPSE<sup>H03</sup>.

96 This study has several limitations. For instance, the mechanism by which IPSE  
97 targets and sequesters chemokines is poorly understood. It is possible that IPSE's  
98 chemokine-binding properties may play a role in its therapeutic effects in the ifosfamide-  
99 injured bladder. Furthermore, we have not elucidated the mechanism by which IPSE  
100 exerts its effects outside the bladder. We chiefly included experiments in which IPSE  
101 was delivered directly to the tissue of interest. It is unclear how the mechanism of action  
102 of H-IPSE<sup>H03</sup> is different when administered in a local versus systemic fashion. For  
103 example, basophil and mast cell recruitment to the bladder to release anti-inflammatory  
104 IL-4 may be modulated differently based on the concentration of regional and systemic  
105 IPSE. Nuclear translocation is an important component of the therapeutic effect of IPSE  
106 and we have not yet investigated transcriptional regulation by H-IPSE<sup>H03</sup>. It is also  
107 unclear whether IPSE operates on a transcriptional level or whether there is a post-  
108 translational component to its mechanism of action. These are areas of ongoing work.

109 In summary, we report the potential therapeutic application of a parasite-derived  
110 protein, H-IPSE<sup>H03</sup>, to treat hemorrhagic cystitis via bladder wall injection. Because we  
111 have found that IPSE modulates the host immune system to dampen inflammation as  
112 well as pain responses, we speculate that this protein could potentially be used for  
113 broader indications, such as interstitial cystitis and other bladder pain syndromes.

114



1 **Acknowledgements**

2 We thank H. Gil Rushton and Hans G. Pohl for their support of urologic basic science  
3 research at Children's National Medical Center.

4 **Grants**

5 This work was supported by funding from the Margaret A. Stirewalt Endowment and the  
6 U.S. National Institutes of Health, National Institutes of Diabetes and Digestive and  
7 Kidney Diseases (1R01DK113504).

8

## References

- 1
- 2
- 3 1. **Ackert-Bicknell CL, Anderson LC, Sheehan S, Hill WG, Chang B, Churchill**
- 4 **GA, Chesler EJ, Korstanje R, Peters LL.** Aging Research Using Mouse Models.
- 5 In: *Current Protocols in Mouse Biology*. John Wiley & Sons, Inc., p. 95–133.
- 6 2. **Andriole GL, Sandlund JT, Miser JS, Arasi V, Linehan M, Magrath IT.** The
- 7 efficacy of mesna (2-mercaptoethane sodium sulfonate) as a uroprotectant in
- 8 patients with hemorrhagic cystitis receiving further oxazaphosphorine
- 9 chemotherapy. *J Clin Oncol* 5: 799–803, 1987.
- 10 3. **Bicer F, Altuntas CZ, Izgi K, Ozer A, Kavran M, Tuohy VK, Daneshgari F.**
- 11 Chronic pelvic allodynia is mediated by CCL2 through mast cells in an
- 12 experimental autoimmune cystitis model. *AJP Ren Physiol* 308: F103–F113,
- 13 2015.
- 14 4. **Bon K, Lichtensteiger CA, Wilson SG, Mogil JS.** Characterization of
- 15 cyclophosphamide cystitis, a model of visceral and referred pain, in the mouse:
- 16 Species and strain differences. *J Urol* 170: 1008–1012, 2003.
- 17 5. **Boucher M, Meen M, Codron JP, Coudore F, Kemeny JL, Eschaliere a.**
- 18 Cyclophosphamide-induced cystitis in freely-moving conscious rats: behavioral
- 19 approach to a new model of visceral pain. *J Urol* 164: 203–8, 2000.
- 20 6. **Chaplan SR, Bach FW, Pogrel JW, Chung JM, Yaksh TL.** Quantitative
- 21 assessment of tactile allodynia in the rat paw. *J Neurosci Methods* 53: 55–63,
- 22 1994.
- 23 7. **Delafosse L, Xu P, Durocher Y.** Comparative study of polyethylenimines for
- 24 transient gene expression in mammalian HEK293 and CHO cells. *J. Biotechnol.*
- 25 (2016). doi: 10.1016/j.jbiotec.2016.04.028.
- 26 8. **Fu C-L, Odegaard JI, Herbert DR, Hsieh MH.** A Novel Mouse Model of
- 27 *Schistosoma haematobium* Egg-Induced Immunopathology. *PLoS Pathog* 8:
- 28 e1002605, 2012.
- 29 9. **Hader JE, Marzella L, Myers RA, Jacobs SC, Naslund MJ.** Hyperbaric oxygen
- 30 treatment for experimental cyclophosphamide-induced hemorrhagic cystitis. *J*
- 31 *Urol* 149: 1617–21, 1993.
- 32 10. **Hewitson JP, Grainger JR, Maizels RM.** Helminth immunoregulation: The role of
- 33 parasite secreted proteins in modulating host immunity. *Mol Biochem Parasitol*
- 34 167: 1–11, 2009.
- 35 11. **Hsieh Y-J, Fu C-L, Hsieh MH.** Helminth-Induced Interleukin-4 Abrogates
- 36 Invariant Natural Killer T Cell Activation-Associated Clearance of Bacterial
- 37 Infection. *Infect Immun* 82: 2087–2097, 2014.
- 38 12. **Lee G.** Uroplakins in the lower urinary tract. *Int Neurourol J* 15: 4–12, 2011.



- 39 13. **Leventhal L, Strassle B.** A model of cystitis pain in the mouse. *Curr Protoc*  
40 *Pharmacol* : 1–11, 2008.
- 41 14. **Lima MVA, Ferreira FV, Macedo FYB, de Castro Brito GA, Ribeiro RA.**  
42 Histological changes in bladders of patients submitted to ifosfamide  
43 chemotherapy even with mesna prophylaxis. *Cancer Chemother Pharmacol* 59:  
44 643–650, 2007.
- 45 15. **Macedo FYB, Mourão LTC, Freitas HC, Lima RCP, Wong DVT, Oriá RB, Vale**  
46 **ML, Brito GAC, Cunha FQ, Ribeiro RA.** Interleukin-4 modulates the  
47 inflammatory response in ifosfamide-induced hemorrhagic cystitis. *Inflammation*  
48 35: 297–307, 2012.
- 49 16. **Matz EL, Hsieh MH.** Review of Advances in Uroprotective Agents for  
50 Cyclophosphamide- and Ifosfamide-induced Hemorrhagic Cystitis. *Urology* 100:  
51 16–19, 2017.
- 52 17. **Mbanefo EC, Le L, Pennington LF, Odegaard JI, Jardetzky TS, Alouffi A,**  
53 **Falcone FH, Hsieh MH.** Therapeutic exploitation of IPSE, a urogenital parasite-  
54 derived host modulatory protein, for chemotherapy-induced hemorrhagic cystitis.  
55 *FASEB J* 32: 000–000, 2018.
- 56 18. **Oguchi T, Funahashi Y, Yokoyama H, Nishizawa O, Goins WF, Goss JR,**  
57 **Glorioso JC, Yoshimura N.** Effect of herpes simplex virus vector-mediated  
58 interleukin-4 gene therapy on bladder overactivity and nociception. *Gene Ther* 20:  
59 194–200, 2013.
- 60 19. **Pennington LF, Alouffi A, Mbanefo EC, Ray D, Heery DM, Jardetzky TS,**  
61 **Hsieh MH, Falcone FH.** H-IPSE is a pathogen-secreted host nucleus infiltrating  
62 protein (infiltrin) expressed exclusively by the *Schistosoma haematobium* egg  
63 stage. *Infect Immun* 85: e00301-17, 2017.
- 64 20. **Ribeiro R, LimaJunior R, Leite C, Mota J, Macedo F, Lima M, Brito G.**  
65 Chemotherapy-induced hemorrhagic cystitis: pathogenesis, pharmacological  
66 approaches and new insights. *J Exp Integr Med* 2: 1, 2012.
- 67 21. **SAKURAI M, SAIJO N, SHINKAI T, EGUCHI K, SASAKI Y, TAMURA T, SANO**  
68 **T, SUEMASU K, JETT JR.** The Protective Effect of 2-Mercapto-Ethane Sulfonate  
69 (MESNA) on Hemorrhagic Cystitis Induced by High-Dose Ifosfamide Treatment  
70 Tested by a Randomized Crossover Trial. *Jpn J Clin Oncol* 16: 153–156, 1986.
- 71 22. **Shepherd JD, Pringle LE, Barnett MJ, Klingemann HG, Reece DE, Phillips**  
72 **GL.** Mesna versus hyperhydration for the prevention of cyclophosphamide-  
73 induced hemorrhagic cystitis in bone marrow transplantation. *J Clin Oncol* 9:  
74 2016–20, 1991.
- 75 23. **Wan D, Ludolf F, Alanine DGW, Stretton O, Ali Ali E, Al-Barwary N, Wang X,**  
76 **Doenhoff MJ, Mari A, Fitzsimmons CM, Dunne DW, Nakamura R, Oliveira**  
77 **GC, Alcocer MJC, Falcone FH.** Use of Humanised Rat Basophilic Leukaemia  
78 Cell Line RS-ATL8 for the Assessment of Allergenicity of *Schistosoma mansoni*  
79 Proteins. *PLoS Negl. Trop. Dis.* (2014). doi: 10.1371/journal.pntd.0003124.

- 80 24. **Watanabe K, Muhoho ND, Mutua WR, Kiliku FM, Awazawa T, Moji K, Aoki Y.**  
81 Assessment of Voiding Function in Inhabitants Infected with *Schistosoma*  
82 *haematobium*. *J Trop Pediatr* 57: 263–268, 2011.
- 83 25. **Yu W, Ackert-Bicknell C, Larigakis JD, MacIver B, Steers WD, Churchill GA,**  
84 **Hill WG, Zeidel ML.** Spontaneous voiding by mice reveals strain-specific lower  
85 urinary tract function to be a quantitative genetic trait. *AJP Ren Physiol* 306:  
86 F1296–F1307, 2014.
- 87

## 1 **Figure Legends**

2

3 **Figure 1:** Bladder wall injection technique. Mice were anesthetized with inhaled  
4 isoflurane. Next their abdomens were depilated and cleaned, injected with local  
5 anesthetic, and a midline laparotomy was performed. The bladder was exteriorized,  
6 stabilized with a cotton applicator, and its wall injected with a 30 gauge needle.

7 **Figure 2:** (A) Western blots of purified H-IPSE<sup>H03</sup> and H-IPSE<sup>H06</sup> proteins demonstrate a  
8 prominent band with a molecular weight of approximately 38-40 kDa. (B) Basophil NF-  
9 AT activation in response to M-IPSE, H-IPSE<sup>H03</sup> and H-IPSE<sup>H06</sup>. Incubation of IPSE with  
10 IgE-bearing basophils demonstrates that H-IPSE orthologs induce NF-AT reporter gene  
11 expression comparable to M-IPSE.

12 **Figure 3:** Effect of H-IPSE<sup>H03</sup> on bladder wet weights. Mice received a bladder wall  
13 injection (A) or a tail vein injection (B) with or without H-IPSE<sup>H03</sup> or a nuclear localization  
14 sequence mutant of H-IPSE<sup>H03</sup> (IPSE<sub>NLS</sub>). Twenty-four hours later, mice were injected  
15 with PBS (control) or ifosfamide (“ifosfamide” or “ifos”). Some mice received neutralizing  
16 anti-IL4 antibody ( $\alpha$ IL4) 30 minutes prior to ifosfamide. Bladders were collected and  
17 weighed 12 hours following ifosfamide injection to assess for edema and hemorrhage.  
18 **A.** Bladder wall injection of H-IPSE<sup>H03</sup> significantly decreases ifosfamide-induced  
19 increase in bladder wet weight in an IL-4- but not nuclear translocation-dependent  
20 fashion. **B.** Tail vein injection of H-IPSE<sup>H03</sup> non-significantly decreases the ifosfamide-  
21 induced increase in BWW in an IL-4 but not NLS-dependent fashion. Plotted data are  
22 pooled from 3 experiments. Error bars represent standard deviations.

23 **Figure 4:** The effect of IPSE bladder wall injections on evoked pain responses (referred  
24 hyperalgesia). H-IPSE<sup>H03</sup> bladder wall injection alleviates allodynia (referred  
25 hyperalgesia) associated with hemorrhagic cystitis-associated pain in an IL-4 and NLS-  
26 dependent manner. Plotted data are pooled from 3 experiments. (\*p=0.04, \*\*p=0.02,  
27 \*\*\*p=0.01; Bars represent means and one standard deviation)

28 **Figure 5:** Voiding dysfunction caused by ifosfamide was non-significantly alleviated by  
29 bladder wall injections of H-IPSE<sup>H03</sup>. Ifosfamide significantly decreased corner voiding  
30 (A & D). H-IPSE<sup>H03</sup> non-significantly restored the percentage of corner voids in  
31 ifosfamide-treated mice (E). Administration of neutralizing  $\alpha$ -IL4 antibody may reverse  
32 the non-significant protective effect of H-IPSE<sup>H03</sup> (F).

33 Central voiding tended to increase following ifosfamide administration (B). The addition  
34 of H-IPSE<sup>H03</sup> (E), neutralizing  $\alpha$ -IL4 antibody (F) or H-IPSE<sup>H03NLS</sup> (G) did not significantly  
35 change the percentage of voiding observed in the center of the cage. Plotted data are  
36 pooled from 3 experiments. \*\*p<0.01; error bars represent standard deviations.

37 **Figure 6:** H-IPSE<sup>H03</sup> co-incubation with MB49 cells induced proliferation in an NLS-  
38 dependent fashion. (A) When co-incubated with H-IPSE<sup>H03</sup>, the number of MB49 cells  
39 was markedly increased versus control over 3 generations of cells. Significant increases  
40 in proliferation were observed for both low (0.065 pmol) and high concentrations of H-  
41 IPSE<sup>H03</sup> (up to 65.5 pmol). (B) MB49 cellular proliferation was not increased compared  
42 to controls by co-incubation with H-IPSE<sup>H03NLS</sup>.

Figure 1

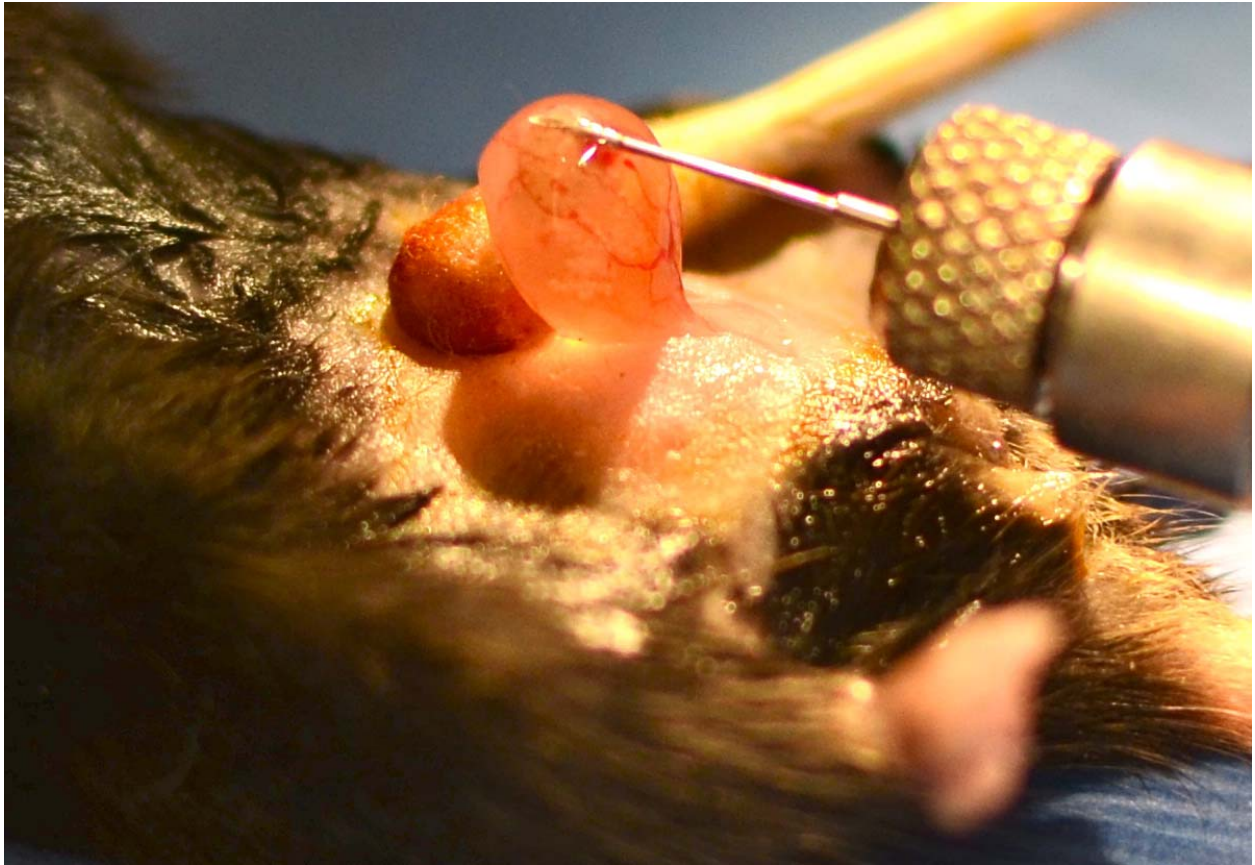

Figure 2

A

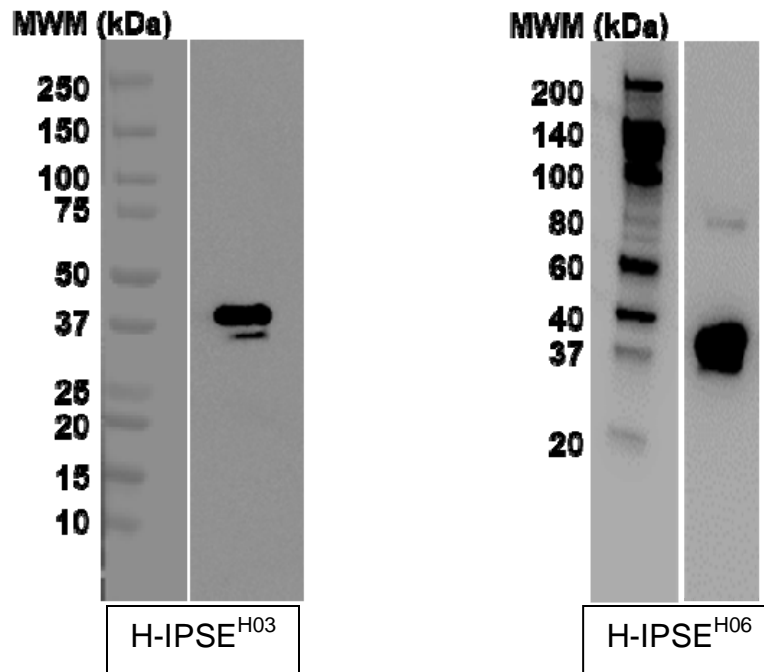

B

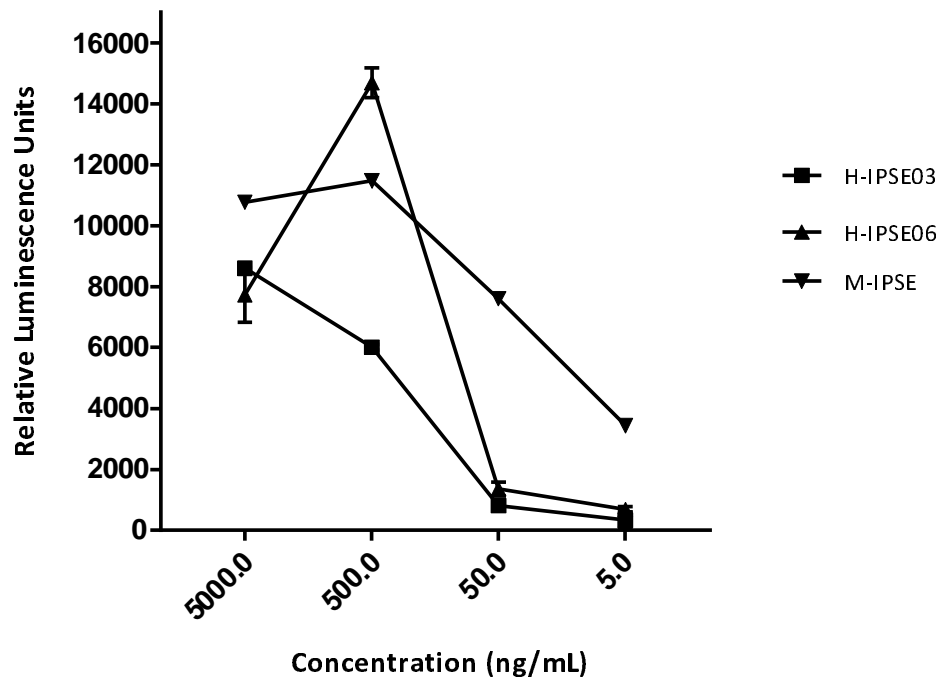

Figure 3

A

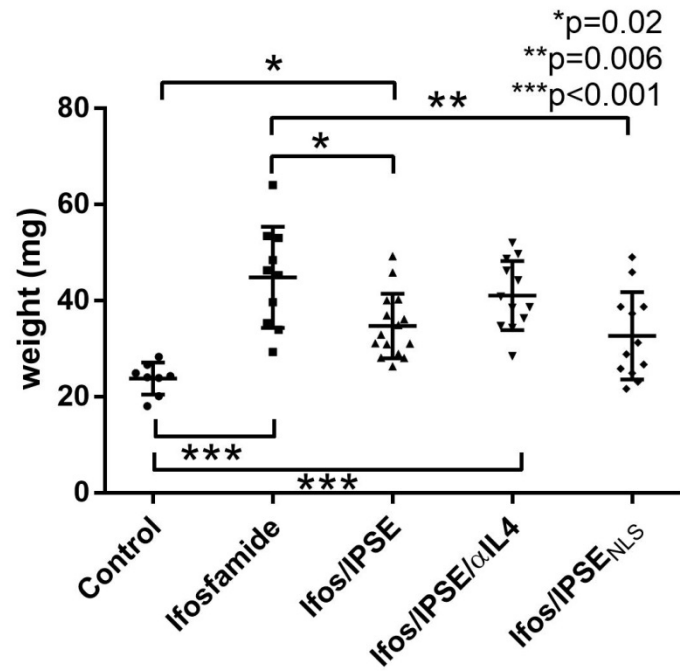

B

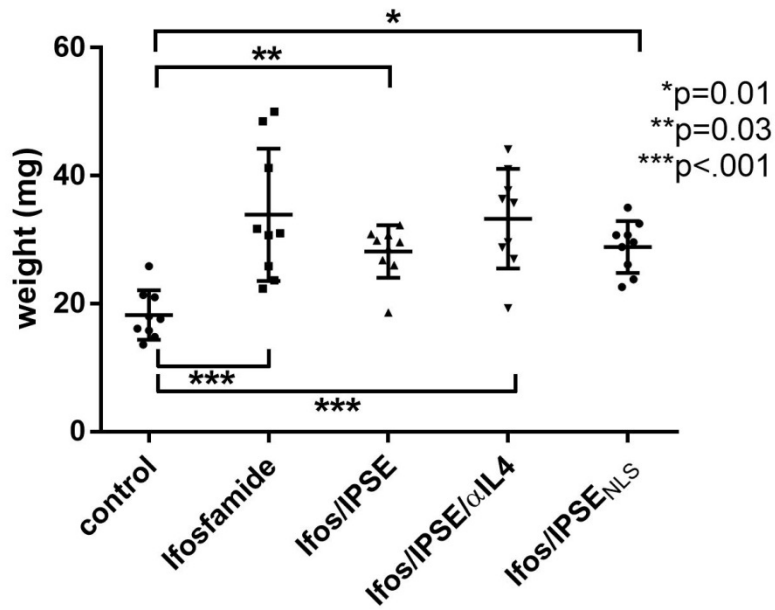

Figure 4

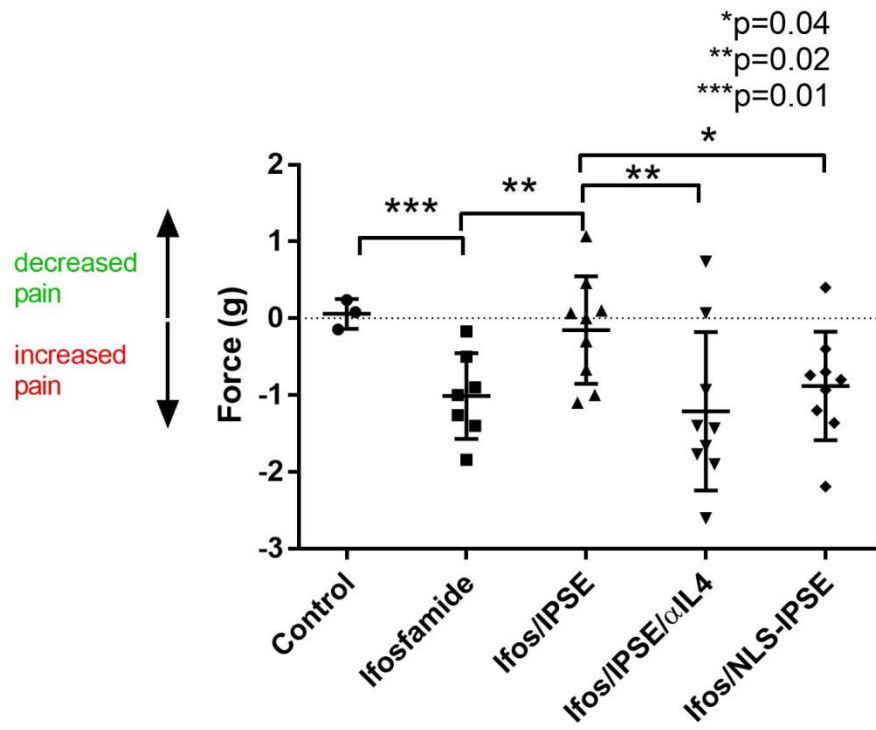



Figure 5

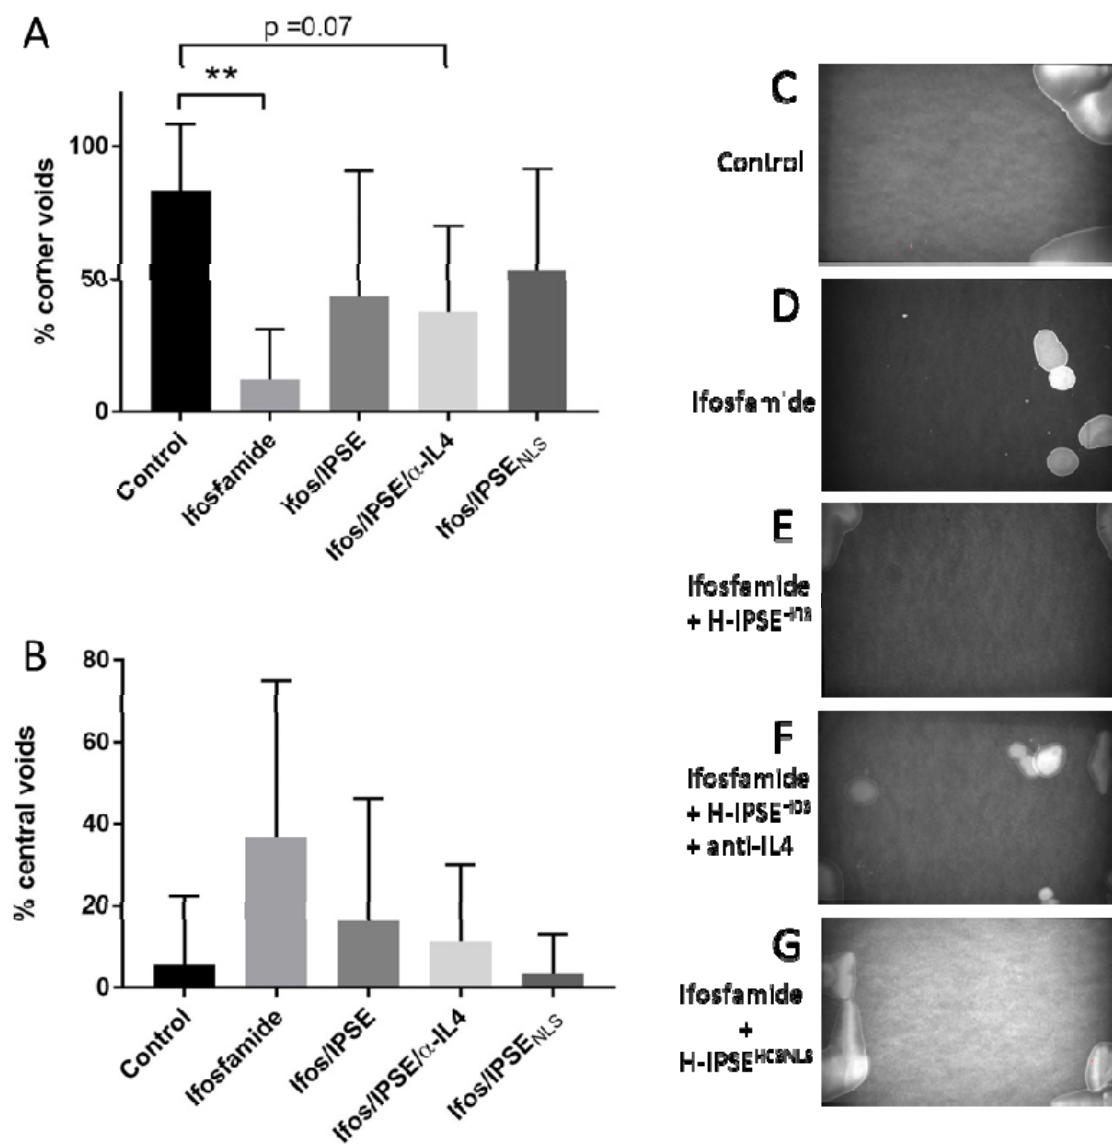

Figure 6

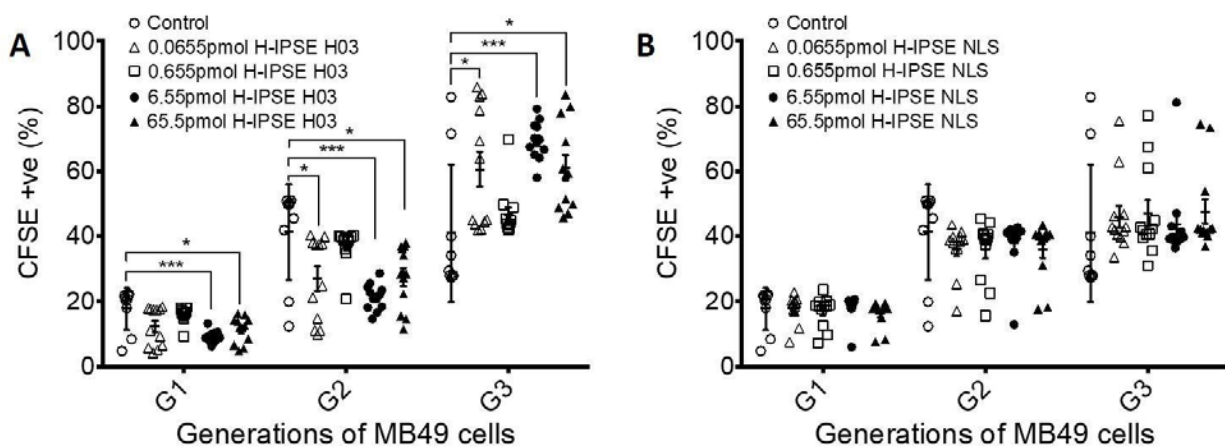

Source: https://www.biorxiv.org/content/10.1101/400424v1.full.pdf
